# Supplementary material for: Gradual drying of permafrost peat decreases carbon dioxide in drier peat plateaus but not in wetter fens and bogs
Source: Copernicus journal article supplement (doi:10.5194/egusphere-2024-2248), 2024-08-02
Supplement: Supplementary file 1 [file egusphere-2024-2248-supplement.pdf]

## Supplemental Materials

### Gradual drying of permafrost peat decreases carbon dioxide in drier peat plateaus but not in wetter fens and bogs

Aelis Spiller<sup>1</sup>, Cynthia M. Kallenbach<sup>2\*</sup>, Melanie S. Burnett<sup>1,6,7</sup>, David Olefeldt<sup>3</sup>, Christopher Schulze<sup>3</sup>, Roxane Maranger<sup>4,5</sup>, Peter M.J. Douglas<sup>1,6,7</sup>

5 <sup>1</sup>McGill University, Department of Earth and Planetary Sciences, Montréal, QC, Canada

<sup>2</sup>McGill University, Department of Natural Resource Sciences, Montréal, QC, Canada

<sup>3</sup>University of Alberta, Department of Renewable Resources, Edmonton, AB, Canada

<sup>4</sup>Université de Montréal, Département de sciences biologiques, Complexe des sciences, Montreal, QC, Canada

<sup>5</sup>Groupe de recherche interuniversitaire en limnologie, Montreal, QC, Canada

10 <sup>6</sup>GEOTOP Research Center, Montréal, QC Canada

<sup>7</sup>Centre d'études nordiques, Québec City, QC Canada

Correspondence to: Cynthia.kallenbach ([cynthia.kallenbach@mcgill.ca](mailto:cynthia.kallenbach@mcgill.ca))

15 **Supplemental Table S1.** Lutose, Alberta Canada site characteristics and peat properties for two transects across a thaw gradient where peat samples were collected for the experimental drying incubation.

**Supplemental Figure S1.** Cumulative CO<sub>2</sub> production by landscape feature ordered from high to low *in situ* peat moisture and averaged across moisture treatments.

20 **Supplemental Figure S2.** Mean N<sub>2</sub>O production between field moisture (wet) and gradual drying (dry) over time (h) for a two-week incubation period.

25 **Supplemental Figure S3.** Mean CO<sub>2</sub> production between field moisture (wet) and gradual drying (dry) over time (h) for a two-week incubation period.

30

35 **Supplemental Table S1.** Lutose, Alberta Canada site characteristics and peat properties for two transects across a thaw gradient where peat samples were collected for the experimental drying incubation. For the peat moisture, total carbon (TC), total nitrogen (TN), C:N,  $\delta^{13}\text{C}$ ,  $\delta^{15}\text{N}$ , ammonium, and nitrate, the mean and standard error from initial peat samples are shown with their one-way ANOVA model p-values. Letters that are different indicate a significant difference among transect features, n=4.

|                                           | Transect 1                                                                                  |                                                      |                                                                                                                                | Transect 2                                                                                                                                        |                                    |                                                                                                                                                          | p-value |
|-------------------------------------------|---------------------------------------------------------------------------------------------|------------------------------------------------------|--------------------------------------------------------------------------------------------------------------------------------|---------------------------------------------------------------------------------------------------------------------------------------------------|------------------------------------|----------------------------------------------------------------------------------------------------------------------------------------------------------|---------|
|                                           | Mature Bog                                                                                  | Young Bog                                            | Peat Plateau 1                                                                                                                 | Fen Center                                                                                                                                        | Fen Edge                           | Peat Plateau 2                                                                                                                                           |         |
| Peat pH                                   | 4.23                                                                                        | 4.65                                                 | 4.13                                                                                                                           | 6.16                                                                                                                                              | 5.2                                | 4.4                                                                                                                                                      |         |
| Water table depth                         | 20-35 cm                                                                                    | 8-13 cm                                              | no water table                                                                                                                 | 1 cm                                                                                                                                              | 5-10 cm                            | no water table                                                                                                                                           |         |
| Vegetation                                | <i>Sphagnum fuscum</i> ,<br><i>Chamaedaphne calyculata</i> ,<br><i>Eriophorum vaginatum</i> | <i>Sphagnum riparium</i> ,<br><i>Carex aquatilis</i> | <i>Cladonia lichens</i> ,<br><i>Sphagnum fuscum</i> ,<br><i>Rhododendron groenlandicum</i> ,<br><i>Chamaedaphne calyculata</i> | Sedge dominated,<br><i>Comarum palustre</i> ,<br><i>Menyanthes trifoliata</i> ,<br>Gallium species,<br>cottongrass,<br>Sphagnum, and brown mosses | Mostly sphagnum amongst the sedges | <i>Cladonia lichens</i> ,<br><i>Picea mariana</i> ,<br><i>Sphagnum fuscum</i> ,<br><i>Rhododendron groenlandicum</i> ,<br><i>Chamaedaphne calyculata</i> |         |
| Peat moisture (%)                         | 91.0 <sup>a</sup>                                                                           | 95.4 <sup>a</sup>                                    | 79.8 <sup>b</sup>                                                                                                              | 90.5 <sup>a</sup>                                                                                                                                 | 93.2 <sup>a</sup>                  | 72.5 <sup>b</sup>                                                                                                                                        | <0.0001 |
| % TC peat                                 | 44.2±0.1 <sup>b</sup>                                                                       | 43.2± 0.5 <sup>b</sup>                               | 45.5 ±0.9 <sup>ab</sup>                                                                                                        | 45.1 ±0.4 <sup>ab</sup>                                                                                                                           | 43.1±0.8 <sup>b</sup>              | 48.9±2.0 <sup>a</sup>                                                                                                                                    | <0.005  |
| % TN peat                                 | 0.52±0.04 <sup>d</sup>                                                                      | 0.83±0.06 <sup>c</sup>                               | 0.74±0.07 <sup>cd</sup>                                                                                                        | 2.44±0.07 <sup>a</sup>                                                                                                                            | 1.80±0.09 <sup>b</sup>             | 1.00±0.07 <sup>c</sup>                                                                                                                                   | <0.0001 |
| C:N peat                                  | 88.7±6 <sup>a</sup>                                                                         | 53.5±3 <sup>b</sup>                                  | 65.5±6 <sup>b</sup>                                                                                                            | 18.6±0.6 <sup>c</sup>                                                                                                                             | 24.3±1 <sup>c</sup>                | 51.4±5 <sup>b</sup>                                                                                                                                      | <0.0001 |
| $\delta^{13}\text{C}$ peat                | -29.76±0.5 <sup>ab</sup>                                                                    | -28.85±0.1 <sup>a</sup>                              | -27.90±0.4 <sup>a</sup>                                                                                                        | -25.95±0.3 <sup>d</sup>                                                                                                                           | -26.08±0.1 <sup>cd</sup>           | -26.88±0.2 <sup>bc</sup>                                                                                                                                 | <0.0001 |
| $\delta^{15}\text{N}$ peat                | -3.98±0.6 <sup>c</sup>                                                                      | -2.58±0.7 <sup>bc</sup>                              | -0.80±1.2 <sup>ab</sup>                                                                                                        | 0.53±0.5 <sup>a</sup>                                                                                                                             | -0.44±0.4 <sup>ab</sup>            | -0.20±0.4 <sup>ab</sup>                                                                                                                                  | <0.0001 |
| Ammonium ( $\mu\text{g g}^{-1}$ dry peat) | 5.7± 1.3 <sup>a</sup>                                                                       | 11.2±4.1 <sup>a</sup>                                | 3.3±0.8 <sup>c</sup>                                                                                                           | 3.8±0.5 <sup>bc</sup>                                                                                                                             | 5.7±1.2 <sup>a</sup>               | 3.3±0.6 <sup>c</sup>                                                                                                                                     | <0.0001 |
| Nitrate ( $\mu\text{g g}^{-1}$ dry peat)  | 5.9±0.6 <sup>b</sup>                                                                        | 7.8±0.8 <sup>a</sup>                                 | 3.9±0.8 <sup>cd</sup>                                                                                                          | 4.4±0.5 <sup>c</sup>                                                                                                                              | 5.7±0.5 <sup>b</sup>               | 2.7±0.4 <sup>d</sup>                                                                                                                                     | <0.0001 |

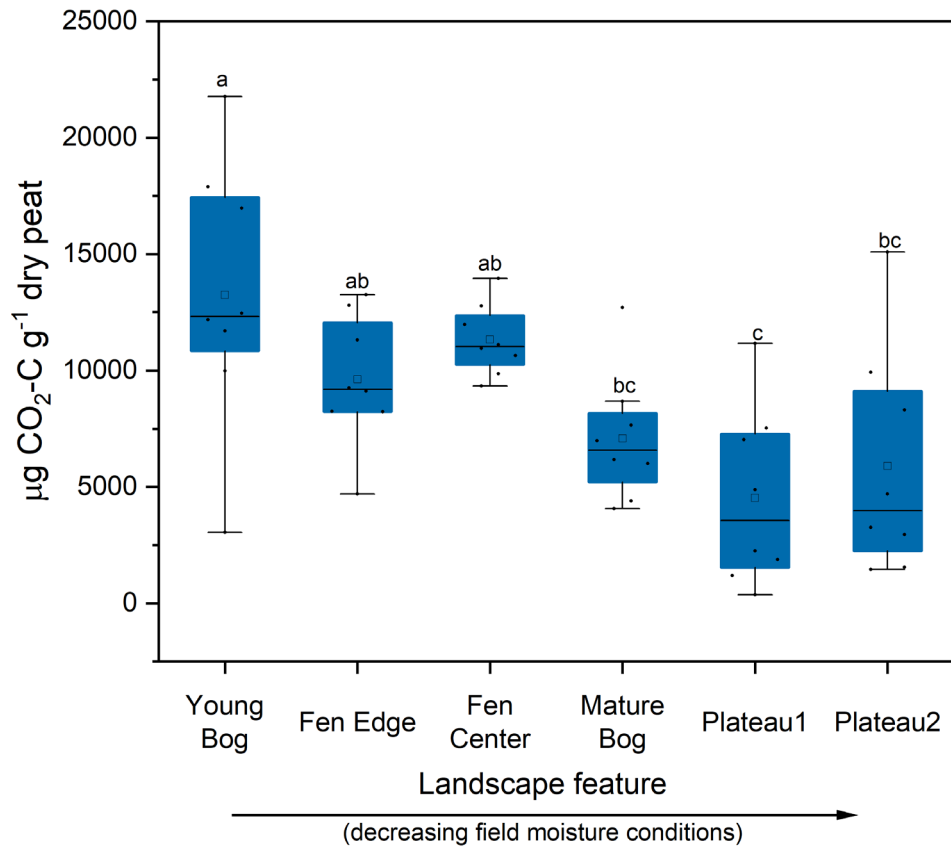

**Supplemental Figure S1.** Cumulative CO<sub>2</sub> production by landscape feature ordered from high to low *in situ* peat moisture and averaged across moisture treatments. Wet treatments were incubated at field moisture conditions, and dry treatments were incubated under gradual drying. Horizontal lines show the median (n=8) and boxes show the 25<sup>th</sup> and 75<sup>th</sup> percentiles. Means that do not share a same letter are significantly different.

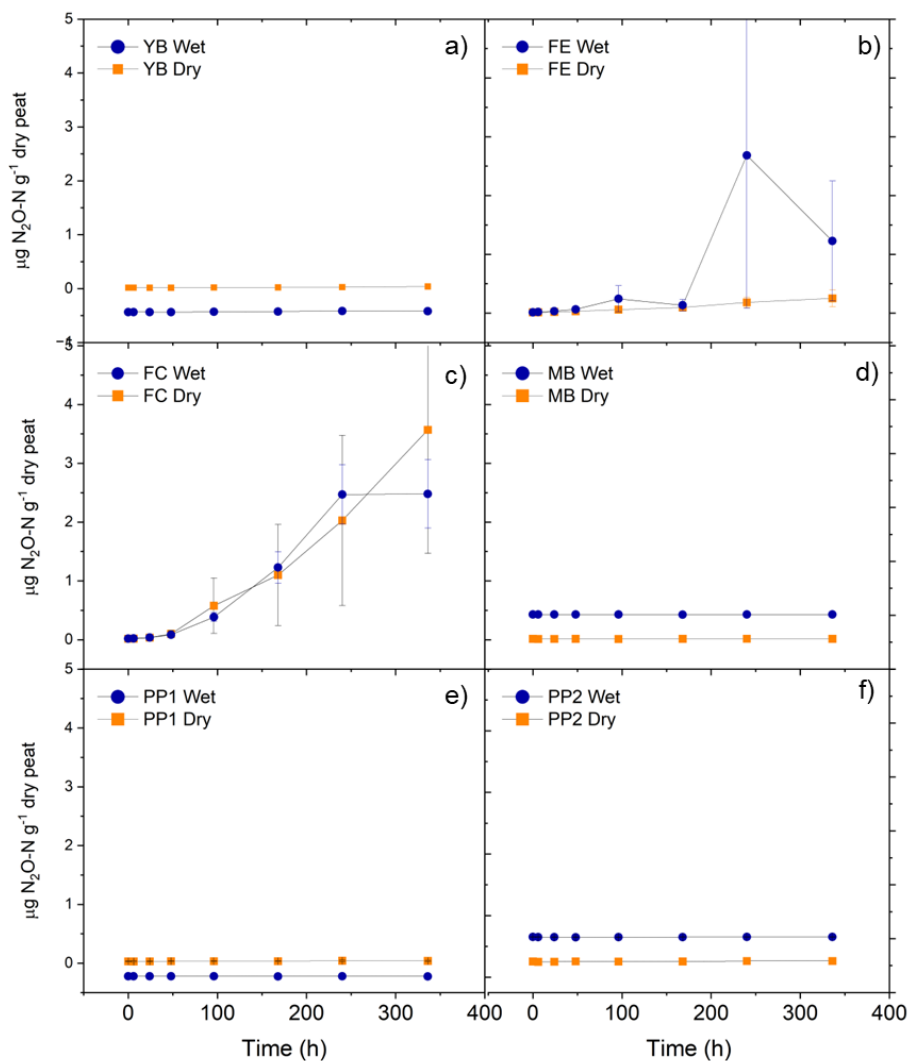

55

**Supplemental Figure S2.** Mean  $\text{N}_2\text{O}$  production between field moisture (wet) and gradual drying (dry) over time (h) for a two-week incubation period. Panels a-f are ordered from wettest to driest field moisture conditions: (a) young bog (YB), (b) fen edge (FE), (c) fen center (FC), (d) mature bog (MB), (e) peat plateau 1 (PP1), and (f) peat plateau 2 (PP2). Error bars are standard error,  $n=4$ .

60

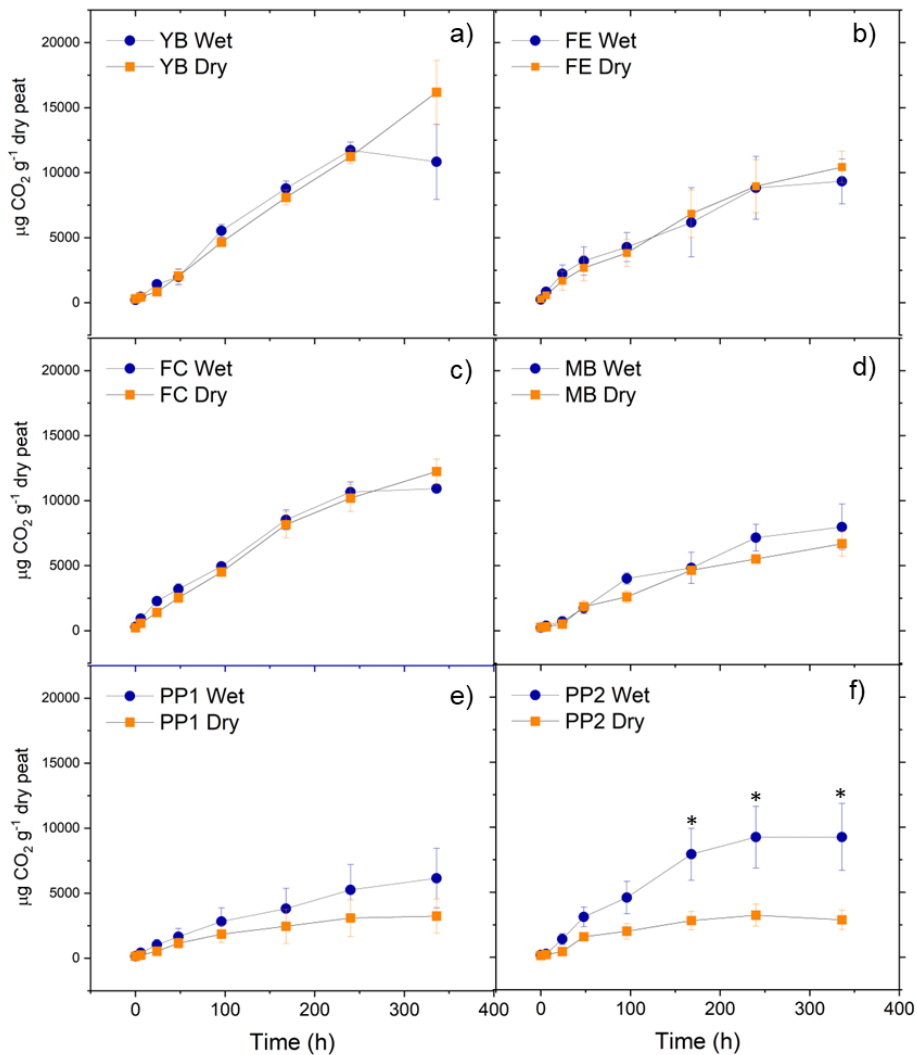

**Supplemental Figure S3.** Mean CO<sub>2</sub> production between field moisture (wet) and gradual drying (dry) over time (h) for a two-week incubation period. Panels a-f are ordered from wettest to driest field moisture conditions: (a) young bog (YB), (b) fen edge (FE), (c) fen center (FC), (d) mature bog (MB), (e) peat plateau 1 (PP1), and (f) peat plateau 2 (PP2). Asterisks indicate significant differences between moisture treatments within a time point. Error bars are standard error, n= 4.
